# Supplementary material for: Effect of H2SO4/H2O2 pre-treatment on electrochemical properties of exfoliated graphite prepared by an electro-exfoliation method
Source: Royal Society of Chemistry journal article supplement (doi:10.1039/d0ra10115j), 2021-01-01
Supplement: d0ra10115j1.pdf [file d0ra10115j1.pdf]

†Electronic Supplementary Information

## Effect of H<sub>2</sub>SO<sub>4</sub>/H<sub>2</sub>O<sub>2</sub> Pre-treatment on Electrochemical Properties of Exfoliated Graphite Prepared by Electro-exfoliation

Oktaviardi Bityasmawan Abdillah,<sup>a</sup> Octia Floweri,<sup>b</sup> Tirta Rona Mayangsari,<sup>c</sup> Sigit Puji Santosa,<sup>d</sup> Takashi Ogi,<sup>e</sup> and Ferry Iskandar<sup>a,b,d\*</sup>

<sup>a</sup> Department of Physics, Faculty of Mathematics and Natural Sciences, Institut Teknologi Bandung, Jl. Ganesha 10, Bandung 40132, Indonesia

<sup>b</sup> Research Center for Nanosciences and Nanotechnology (RCNN), Institut Teknologi Bandung, Jl. Ganesha 10 Bandung 40132, Indonesia

<sup>c</sup> Department of Chemistry, Universitas Pertamina, Jl. Teuku Nyak Arief, Simprug, Jakarta 12220, Indonesia

<sup>d</sup> National Center for Sustainable Transportation Technology (NCSTT), Institut Teknologi Bandung, Jl. Ganesha 10 Bandung 40132, Indonesia

<sup>e</sup> Chemical Engineering Program, Graduate School of Advanced Science and Engineering, Hiroshima University, 1-4-1 Kagamiyama, Hiroshima 739-8527, Japan

\*email address: ferry@fi.itb.ac.id

---

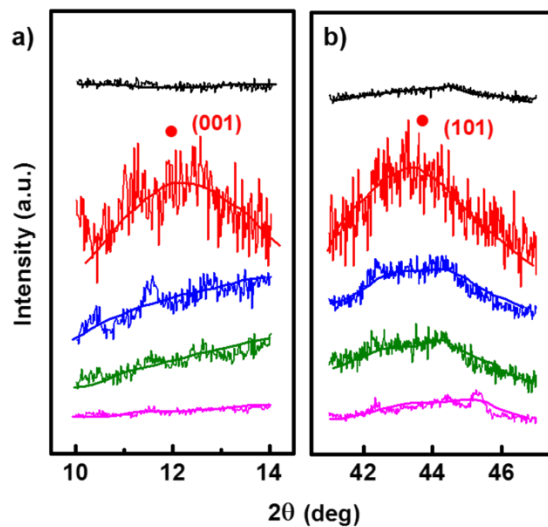

**Fig. S1.** Enlarged X-Ray Diffraction (XRD) pattern of graphite sheet precursor (p-GS) (black) and exfoliated graphite (EG) obtained after pre-treatment in  $\text{H}_2\text{SO}_4/\text{H}_2\text{O}_2$  with various volume fractions (EG 100:0 (red), EG 95:5 (blue), EG 93:7 (green), and EG 91:9 (pink)) along  $2\theta$  of (a)  $10\text{-}14^\circ$  and (b)  $41\text{-}47^\circ$ .

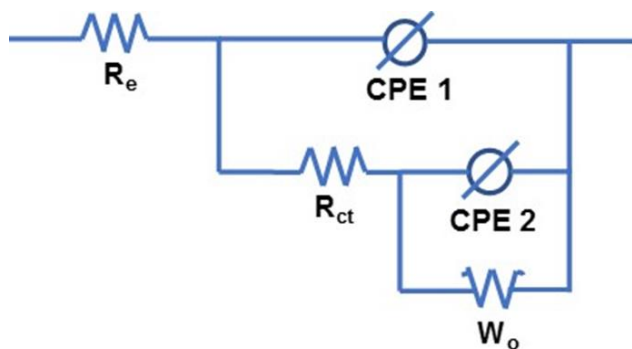

**Fig. S2.** Equivalent circuit used to fit the Nyquist plots from Electrochemical Impedance Spectroscopy (EIS) measurement.

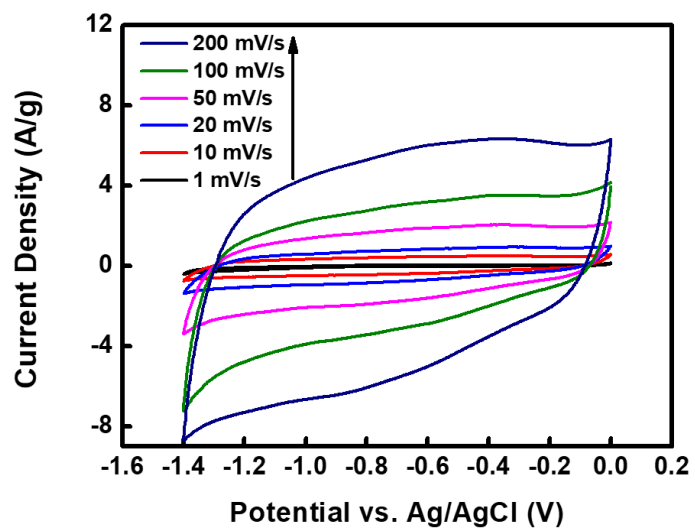

**Fig. S3.** Cyclic Voltammetry (CV) curves of EG 95:5 measured at various scan rate (1-200 mV/s) with potential window of 1.4 V.
